# Supplementary material for: A modified Delphi study to identify the features of high quality measurement plans for healthcare improvement projects
Source: BMC Med Res Methodol. 2020 Jan 14;20:8. doi: 10.1186/s12874-019-0886-6 (PMC6961316; doi:10.1186/s12874-019-0886-6)
Supplement: Supplementary file 1 — Additional file 1: Appendix 1. Table of candidate questions for measurement plan review. Appendix 2. Consensus results: table of measurement plan review questions. [file 12874_2019_886_MOESM1_ESM.xlsx]

## Sheet: Appendix 1
Question Number	TABLE OF CANDIDATE QUESTIONS FOR MEASUREMENT PLAN REVIEW (All Questions have Yes or No response options unless stated otherwise. Branching questions are included to ensure logical flow: For example, questions 1a-1c are only relevant if the team has stated an aim for their quality improvement initiative, so a branching question (1) “Is the aim of the quality improvement initiative stated?” is aske…
	Category 1: Design of measurement
	Subcategory 1: Aim
1	Is the aim of the quality improvement initiative stated?
1a	Within the aim, is the aspiration(s) of the initiative stated?
1b	Within the aim, is the scope of the initiative defined?
1c	Within the aim, is the time frame for the initiative specified?
2	Have any organisational, local and/or national priorities that are aligned to the aim been stated?
3	Has any stakeholder involvement in agreeing the aim been stated?
4	Have any objective(s) to achieve the aim been stated?
	Subcategory 2: Measure set
5	Have the selected measures for improvement been clearly named?
6	Have all the selected improvement measures been linked to the aim?
7	For all the selected measures, has the rationale for selection been stated?
8	Is there a plan to stop current routine measures or data collection that is not necessary (not used or valued in the organisation)?
9	How many measures have been selected? (Response options are as follows: 0, 1-4, 4-11, greater than 11, with the mid-range being the preferred option.)
9a	How many outcome measures have been selected? (Response options are as follows: 0, 1-3, greater than 3, with the mid-range being the preferred option.)
9b	How many process measures have been selected? (Response options are as follows: less than 2, 2-5, greater than 5, with the mid-range being the preferred option.)
9c	How many balancing measures have been selected? (Response options are as follows: 0, 1-3, greater than 3, with the mid-range being the preferred option.)
10	Does the measure set include measures which take account of known potential external factors?
11	Does the measure set include any existing measures? If the response is yes, QI teams will be asked to indicate the source(s) of existing measures.
12	Is evidence to support the validity of all the selected measures stated?
13	Is evidence to support the reliability of all the selected measures stated?
14	Has any stakeholder involvement in agreeing the measure set been stated?
	Subcategory 3: Operational definition
15	Have operational definitions been written for all the selected measures for improvement?
16	For all the relevant measures, have the denominators been clearly defined, including the requisite data elements? (This question only applies to measures comprising a numerator and denominator e.g. percentages and rates.)
17	For all the relevant measures, have explicit inclusion and/or exclusion criteria been provided for the denominators? (This question only applies to measures comprising a numerator and denominator e.g. percentages and rates.)
18	For all the relevant measures, have the numerators been clearly defined, including requisite data elements? (This question only applies to measures comprising a numerator and denominator e.g. percentages and rates.)
19	For all the relevant measures, have explicit inclusion and/or exclusion criteria provided for the numerators? (This question only applies to measures comprising a numerator and denominator e.g. percentages and rates.)
20	For all other measures, has the measure been defined, including the requisite data elements? (This question only applies to measures not comprised of a numerator and denominator e.g. counts.)
21	For all other measures, have explicit inclusion and/or exclusion criteria been provided? (This question only applies to measures not comprised of a numerator and denominator e.g. counts.)
22	Is the direction of desired change clearly articulated for all the measures?
23	Has the data aggregation approach for all the measures been stated?
24	Have the source(s) of data collection been clearly stated for all the measures?
25	Where possible, is there a plan to use routinely collected data for the measures? (This question has an additional response option of No relevant routinely collected data available.)
26	Has access been granted to all the required data?
27	Have methods of data collection been stated for all the measures?
28	Has the frequency of data collection been stated for all the measures?
29	Does the plan make clear whether and why measures have or have not been stratified?
30	Is it clear, for each measure, whether census or sampling will be used?
30a	For all the relevant measures, have the sampling strategies been described?
30b	For all the relevant measures, have the sampling strategies been justified for the measures?
30c	For all the relevant measures, has the rationale for the sample sizes been articulated?
30d	For all the relevant measures, has a statistician been involved in establishing the sample sizes?
31	Has a baseline data collection time frame been specified for all the selected measures?
32	Has the process for establishing baseline performance been stated for all the measures?
33	Is it clear that baseline data will use the same operational definitions as developed for the measures?
34	Have numerical goals been set for any measures?
34a	For all the relevant measures, have numerical goals been justified?
34b	For all the relevant measures, is it clear whether numerical goals have been externally or internally set?
34c	For all the relevant measures, has any stakeholder agreement of numerical goals been stated?
34d	For all the relevant measures, is there a plan in place for when numerical goals will be reassessed?
35	Have the operational definitions for all selected measures been agreed by the QI team, including any available measurement experts?
	Category 2: Data collection and management
	Subcategory 4: Data collection process
36	Have resources required for data collection been specified?
37	Have roles and responsibilities around data collection, storage and management been stated?
38	Has the protocol for data management been described?
38a	Is there a plan in the data management protocol to prevent data corruption or loss?
38b	Is there a plan in the data management protocol to ensure that data are secure?
39	Has where data will be recorded been stated?
40	Does the text on the data collection form / screen reflect accurately and clearly the operational definition?
41	Do staff collecting data understand the data collection form/screen well?
42	Is there a plan to ensure standardised data collection tools across different settings? (This question has an additional response option of Not Applicable.)
43	Is there a plan for pilot-testing new or adapted data collection tools?
44	Will an operations manual be made available to data collection staff?
45	Have negative impacts of data collection on patients or staff involved in the initiative been considered?
46	Is there a plan to seek and obtain ethical approval? (This question has an additional response option of Not Applicable.)
	Subcategory 5: Training in and embedding of consistent data collection
47	Is there a plan for a training programme for data collection staff? (This question has an additional response option of Not Applicable.)
48	Is there a plan for orientation activities for data collection staff?
49	Is there a plan to certify competency of data collection staff prior to enrolling patients?
50	Is there a plan to assess the quality of data collection throughout the initiative?
51	Is there a plan in place to account for staff turnover?
	Subcategory 6: Database design
52	Is there a plan to create or modify a database for the project data? (This question has an additional response option of Not Applicable.)
52a	Is there a plan to for the database have branching logic where appropriate?
52b	Is there a plan to minimise manual data entry and/or transfer?
52c	Is there a plan for live data validation?
	Subcategory 7: Outliers and missing data
53	Is there a plan in place for both the prospective (1) identification and (2) investigation of outliers?
54	Is there a plan in place for the prospective identification of missing data?
55	Have the methods for minimising missing data been explicitly defined?
	Category 3: Analysis
	Subcategory 8: Planning the analysis
56	Is the study design clearly stated? (If response to this question is yes, QI teams will be asked to indicate their study design.)
57	Have roles and responsibilities around the analyses and display of data been stated?
58	Have potential changes in the target population been considered when planning the analysis?
59	Is there a plan for quantitative data analysis?
59a	Is there a plan to use Statistical Process Control? (This question has an additional response of Not Applicable.)
59b	Is there plan for investigating and addressing special cause and common cause variation?
59c	Is there another approach planned for understanding and addressing variation? (This question has an additional response of Not Applicable.)
59d	Is there a plan for representing precision for the measures?
60	Is there a plan for qualitative data analysis? (This question has an additional response option of Not Applicable.)
61	Is it clear when the team plan to begin implementing changes to the care process?
62	Does the planned analysis take account of missing data?
63	Is there a plan to conduct sensitivity analysis? (This question has an additional response option of Not Applicable.)
64	Does the planned analysis take account of potential confounders? (This question has an additional response option of Not Applicable.)
65	Has technical expert involvement in the planning of the analysis been stated? (This question has an additional response option of Not Applicable.)
66	Is there explicit acknowledgement of limitations and potential biases of the intended analysis?
67	Is the intended lag time between the data collection and data availability for feedback to the team stated?
68	Is the intended frequency of feedback of the analysis to the team stated?
	Category 4: Action
	Subcategory 9: Planning for action
69	Is there a plan for who will receive and/or review the results from the analysis?
70	Has it been stated how often different groups of people will receive and/or review the results?
71	Have the roles and responsibilities around taking action on results been stated?
72	Are there processes in place for both (1) documentation (including information that precipitated the action) and (2) follow-up of actions?
	Category 5: Embedding
	Subcategory 10: Planning for sustainability
73	Is there a plan to assess the ongoing appropriateness of measures?
74	Is there a plan for aspects of the measurement process to become part of job descriptions?
75	Is there a plan for monitoring the measurement process and addressing problems?
76	Is there a communications plan to ensure that relevant stakeholders are kept up to date and engaged with the initiative through the measures?
77	Is there a plan to integrate appropriate measures into routine data systems?
78	Is there a plan to assess the costs of the data collection, analysis and review cycle?
79	Is there a plan to assess whether relevant stakeholders perceive the benefits of data collection, analysis and review as exceeding the costs?
80	Is there a plan to embed the measures within organisational structures?
81	Is there an evaluation plan for assessing sustainability of the changes made?

## Sheet: Appendix 2
Question Number	CONSENSUS RESULTS: TABLE OF MEASUREMENT PLAN REVIEW QUESTIONS (All Questions have Yes or No response options unless stated otherwise. Branching questions are included to ensure logical flow: For example, questions 1a-1c are only relevant if the team has stated an aim for their quality improvement initiative, so a branching question (1) “Is the aim of the quality improvement initiative stated?” is…	Consensus to Keep
	Category 1: Design of measurement
	Subcategory 1: Aim
1	Is the aim of the quality improvement initiative stated? Explanation The aim is what the QI team will try to accomplish. The aim needs to indicate direction. To do this, the team can use verbs such as “to improve, to reduce, to increase…” followed by a definition of what constitutes improvement, to be open to evolution over time. The aim should clarify the anticipated patient and/or public benefi…	R1 -100%
1a	Within the aim, is the benefit to patients stated? Explanation Benefits to patients and/or the public can include improved prevention of disease, safer care, better clinical outcomes, improved quality of life, more patient-centred care, better experiences of care, more timely care, more equitable services, and better value services. The Institute of Medicine’s six “Aims for Improvement” can help …	R2-79%
1b	Within the aim, is the scope of the initiative defined? Explanation Scope refers to the intended reach of the initiative. It should include information about the target population (e.g. type of condition; age; severity or stage of condition; exclusions etc.), the target setting (type and number of units/sites; process to be improved etc.) and the stage of care (admission to hospital; transition f…	R1-79%
1c	Within the aim, is the time frame for the initiative specified? Explanation The time by which the QI team expect to achieve the aim can be in days, months, or years. Take the environment, scope of change, and how the QI initiative fits into the overall work plan into consideration when specifying the time period. Setting a time period for a QI initiative helps in planning and makes it clear that …	R1-95%
2	Have you stated your assumptions and hypotheses about how your interventions relate to your aim? Explanation Contributing factors, sometimes phrased as primary drivers or objectives, influence achievement of the aim and are logically connected to the planned intervention(s). They can be derived from Driver diagrams, Action Effect Diagrams, Logic Models etc. and may be based on existing evidence, …	Consensus meeting
3	Does the plan identify relevant contextual influences that may impact achievement of the aim? Explanation Some measures may be justified on the basis that they account for the impact of context on the intervention or its outcome. Here, context refers to factors outside the control of the initiative that have the potential to impact on its success. Process mapping of the whole patient pathway, as …	Consensus meeting
4	Have numerical goals been set for the quality improvement initiative? Explanation Setting of numerical goals can be dependent on baseline performance, national standards, local targets etc. Regardless of whether numerical goals are rates, percentages, or counts, they should be stated as a desired value of measure not a relative measure. To focus the QI team in the short-term and to demonstrate ho…	R2-94%
4a	Have checkpoints reviewing the numerical goals been stated? Explanation Reviews of the appropriateness of numerical goals should occur at specific intervals during the QI initiative and involve stakeholders. If the numerical goal has been achieved, the QI team may want to set a higher goal. In the event that a numerical goal has not been achieved in the specified time frame, the QI team can recon…	R2-87%
5	Does the plan state who was involved in agreeing the aim? Explanation Stakeholders are people who will be affected by, or can influence the success of the QI initiative. Stakeholder analysis and mapping can be used to identify the key groups of people with different perspectives that will be needed to discuss, negotiate, and agree on an aim. This should include executive sponsors as well as patie…	R2-78%
6	Is a high level timeline for testing, scale-up and implementation proposed in the plan? Explanation Although it is not possible to plan in advance the detailed timing of Plan-Do-Study-Act cycles, the timeline should be kept high-level and refer to target dates for commencing testing of the intervention, the stages of scale up, and implementation. It is useful to show these milestones on planning …	R2-84%
	Subcategory 2: Measure set
7	Have the selected measures for improvement been identified? Explanation Measures for improvement are a few specific measures, which demonstrate whether changes are making improvements. Action Effect Diagrams, driver diagrams, logic models etc. can be used to identify selected measures for improvement. The selected measures for improvement should be clearly named in a list. The unit of analysis (d…	R1-89%
8	For all the selected measures, has the rationale for selection been stated? Explanation Stating the rationale involves justifying the importance and relevance of selected measures. This can be derived from evidence in existing literature, local context, and influence of internal and/or external stakeholders. In addition, reasons to support the choice of a particular type of measure (average, perc…	R1-87%
9	How many measures have been selected? (Response options are as follows: 0, 1-4, 4-11, greater than 11, with the mid-range being the preferred option.) Explanation A measure is a way of assigning a number to an event or concept of interest, allowing comparison over time or groups. The QI team should identify a set of process, outcome and balancing measures to assess whether changes are improvement…	R2-78%
9a	How many outcome measures have been selected? (Response options are as follows: 0, 1-3, greater than 3, with the mid-range being the preferred option.) Explanation Outcome measures reflect the impact on the patient and show the end result of your improvement work. For example, quality of life for patients with chronic obstructive pulmonary disease after discharge from hospital. Explanation Outcom…	R2-78%
9b	How many process measures have been selected? (Response options are as follows: less than 2, 2-5, greater than 5, with the mid-range being the preferred option.) Explanation Process measures reflect the way your systems and processes work to deliver the outcome you want. For example, percentage of patients who had a follow up appointment booked before they left hospital. Explanation: Process meas…	R1-83%
9c	How many balancing measures have been selected? (Response options are as follows: 0, 1-3, greater than 3, with the mid-range being the preferred option.) Explanation: Balancing measures reflect unintended consequences of the change (positive or negative). For example, for the example project aiming at improving quality of life after discharge from hospital, the length of stay in hospital for indi…	R1-83%
10	Does the measure set include any existing measures? If the response is yes, QI teams will be asked to indicate the source(s) of existing measures. Explanation Sources of existing quality measures include healthcare quality organisations, published and grey literature, and measures from other QI initiatives. Existing measures can be useful for several reasons: the necessary data and analysis may a…	R1-84%
11	Does the plan state which stakeholders have agreed to the measure set? Explanation Different groups of people will need different types of information in order to relate to the improvement work of the QI initiative. It is crucial that the measure set includes enough measures that are useful and valued by staff and patients in the targeted part of the service. Stakeholder analysis and mapping can …	R2-88%
	Subcategory 3: Operational definition
12	Have operational definitions been written for all the selected measures for improvement? Explanation An operational definition is a quantifiable description of what will be measured and the specific steps to measure it consistently. It should include detailed information about the measure such as the inclusion and/or exclusion criteria, data elements, method of calculation, data source(s), method…	R1-79%
13	For all the relevant measures, have the denominators been clearly defined, including the requisite data elements? (This question only applies to measures comprising a numerator and denominator e.g. percentages and rates.) Explanation: The denominator is the lower portion of a fraction. In quality improvement, it often refers to the number of people eligible for, or at risk of, the numerator event…	R1-95%
14	For all the relevant measures, have explicit inclusion and/or exclusion criteria been provided for the denominators? (This question only applies to measures comprising a numerator and denominator e.g. percentages and rates.) Explanation Part of clearly defining a denominator is stating any inclusion and/or exclusion criteria. The inclusion criteria describes the population of interest for the den…	R1-78%
15	For all the relevant measures, have the numerators been clearly defined, including requisite data elements? (This question only applies to measures comprising a numerator and denominator e.g. percentages and rates.) Explanation The numerator is the upper portion of a fraction. In quality improvement, it often refers to the number of people who have experienced an event, such as an adverse outcome…	R1-100%
16	For all the relevant measures, have explicit inclusion and/or exclusion criteria provided for the numerators? (This question only applies to measures comprising a numerator and denominator e.g. percentages and rates.) Explanation The inclusion criteria describes the population of interest for the numerator, whereas, exclusion criteria describes the population not eligible for inclusion in the num…	R1-78%
17	For all other measures, has the measure been defined, including the requisite data elements? (This question only applies to measures not comprised of a numerator and denominator e.g. counts.) Explanation Data elements necessary to construct the measure should be stated, along with the calculation and aggregation method used to derive the measure. If applicable, the measurement unit and degree of …	R1-79%
18	Has the data aggregation approach for all the measures been stated? Explanation Aggregation is the process of taking raw data and summarising it as a number, and can include counting, averaging (using the mean, median, or mode), summing, and expressing as a proportion. Unless a measure pertains to individuals (e.g. measuring length of stay of consecutive patients as a time series), it is likely t…	R1-84%
19	Have the source(s) of data collection been clearly stated for all the measures? Explanation Different types of data can be collected from multiple sources for differing purposes. These include routinely collected data in existing administrative databases, existing medical records, prospectively collected clinical data, and prospectively collected survey data from questionnaires and interviews. Th…	R1-95%
20	Is there a statement on the feasibility of using routinely collected data for the measures? (This question has an additional response option of No relevant routinely collected data available.) Explanation Using existing medical records or mandatory reporting databases, the QI team can access a vast amount of routinely collected data on patient demographics, clinical condition, care received, and …	R2-79%
21	Has access been granted to all the required data? Explanation Knowing the data exists is not the same as being able to use it. Communicate early with the information manager for the database of interest for access to be granted to the routinely collected data. Depending on the data source, there may be public access to the data, access may require an email address and/or password, it may have to …	R1-83%
22	Have methods of data collection been stated for all the measures? Explanation Methods of data collection refer to the procedures and processes that will be used to gather the data from its source. For instance, if using equipment, specify the name of the device, how it will be used, and the degree of precision needed, that is, whole numbers or decimal places. It is most desirable for the method o…	R1-100%
23	Has the frequency of data collection been stated for all the measures? Explanation Measures should be collected at intervals frequent enough to assess and act on project progress. This could mean continuously, hourly, daily, weekly, bi-weekly, monthly, or quarterly. The QI team should also take the duration of the data collection into account when deciding how often they will collect data, as thi…	R1-95%
24	Does the plan make clear whether and why measures have or have not been stratified? Explanation Stratification is when a measure is considered separately for data from different subgroups. Knowledge of differences in processes of care can be used to decide on stratification. Examples include different time periods (e.g. weekend versus weekday); demographics such as age; organisation/unit; treatme…	R1-82%
25	Is it clear, for each measure, whether census or sampling will be used? Explanation: Census refers to all the available data from the population of interest, whereas for sampling only a subset i.e. sample of the data from the population will be collected. If population of interest is small or data for all patients or service users is already available, there is no need to sample and all available…	R1-82%
25a	For all the relevant measures, have the sampling strategies been described? Explanation For each relevant measure, give a precise operational statement on how, when, and by whom samples will be chosen, along with any sample size constraints. For statistical process control (SPC), there are resources available providing guidance, and experts can be consulted. For statistics for inference, e.g. con…	R1-89%
26	Has the process for establishing baseline performance been stated for all the measures? Explanation The QI team should make use of run or control charts to establish a robust baseline. 20 to 25 data points is usually enough to establish representative baseline data using a control chart, or 12 points when using a run chart. So for a weekly control chart, 20-25 weeks is ideal. Exceptions include w…	R2-95%
27	Has a baseline data collection time frame been specified for all the selected measures? Explanation Baseline data indicates current performance of the system with respect to each measure before implementation of any interventions. Without knowing the current performance, the team will be unable to know or demonstrate whether the change was indeed an improvement. For some measures, notably measure…	R1-83%
28	Is it clear that baseline data will use the same operational definitions as developed for the measures? Explanation If the operational definitions used for baseline data differ from the operational definitions used for measure data collected after implementing changes, an accurate comparison cannot be made as slightly different phenomena may have been measured. This is most often a problem when e…	R1-78%
29	Have you documented that the relevant stakeholders have been consulted about the operational definitions? Explanation It is important that relevant stakeholders have reviewed and agreed to the operational definitions. This is not limited to information analysts and statisticians; this can also include clinicians, patients and managers. Before sign off, the definitions should have been tested in p…	Consensus meeting
	Category 2: Data collection and management
	Subcategory 4: Data collection process
30	Have resources required for data collection been specified? Explanation Resources for data collection and management can include funding for training staff, payment for overtime or bank staff during the project phase, payment for backfill, time for staff involved, and type of equipment required. The QI team should seek a balance between the resources required to collect and manage data to constru…	R1-84%
31	Have roles and responsibilities around data collection, storage and management been stated? Explanation Roles and responsibilities for data collection and management should be discussed and agreed by the QI team. As measurement becomes part of routine, responsibility for this should shift from the QI team to the organisation. Assigning roles and responsibilities for data collection is vital for e…	R1-89%
32	Has the protocol for data management been described? Explanation The plan should include a short but comprehensive statement of how the data will be processed and managed from collection to safe storage. It should include responsibilities for data flow, checks and feedback on completeness of data, safeguards against accidental corruption or loss of data, and how the security of the data will be m…	R1-89%
32a	Is there a plan in the data management protocol to prevent data corruption or loss? Explanation Ways to prevent corruption and loss of data can include ensuring anti-virus software is updated, having an adequate and tested back-up routine for any databases, including how often back-ups will occur. Having steps in place to prevent data corruption or loss is important because of the risk of any sen…	R1-89%
32b	Is there a plan in the data management protocol to ensure that data are secure? Explanation Data security refers to the necessary procedures and technical measures put in place to ensure the privacy and confidentiality of collected data. Strategies to keep data secure include deciding who is authorised to access, edit and delete the collected data, and ensuring that this is reflected in the relev…	R1-83%
33	Does the plan state how the data should be collected? (e.g. paper form, electronic form, wearable device, etc.) Explanation Collected data can be recorded into existing information systems or the QI team can prepare a paper form to capture the data. Knowledge of the data collection tool and where it is stored ensures that when there is turnover of data collection staff, the files can be easily lo…	Consensus meeting
34	Is there a plan for pilot-testing new or adapted data collection tools? Explanation Pilot testing of the data collection tool should be done on a small sample. Even for routinely collected data, it is important to check that the desired extracts can be obtained. Pilot testing the data collection tool helps to ensure that collected data is accurate and recorded consistently. It is useful for ident…	R1-83%
35	Have negative impacts of data collection on patients or staff involved in the initiative been considered? Explanation Negative impacts can be identified when data collection tools are pilot tested. Examples include data collection competing for time with care provision. Whilst such issues may be captured through balancing measures, these measures are often not explicitly constructed to pick up ne…	R1-89%
36	Is there a plan to seek and obtain ethical approval? (This question has an additional response option of Not Applicable.) Explanation The QI team can consult local (i.e. institutional), regional or national policies to find out if ethical approval is required. If an initiative is deemed exempt from an ethics review, the reason for exemption should be clearly stated. For instance, if the policy us…	R1-89%
	Subcategory 5: Training in and embedding of consistent data collection
37	Is there a plan for a training programme for data collection staff? (This question has an additional response option of Not Applicable.) Explanation Training programmes should be appropriate to the context within which data is being collected, for instance, face-to-face communication, telephone etc. To sustain data collection efforts, the team should consider training of additional persons in the…	R1-88%
38	Is there a plan to assess the quality of data collection throughout the initiative? Explanation Data quality assurance reviews are retrospective and involve checking the accuracy and completeness of a sample of collected data. This can be done at random or pre-set times throughout the life span of the QI initiative. This quality assurance can draw on other databases or on manual review. Depending…	R1-94%
	Subcategory 6: Database design
39	Is there a plan to create or modify a database for the project data? Explanation Existing databases can be modified, or if not, a new database can be created. Information analysts and IT teams can often advise on the best approach for the organisation. Development of a database requires resource and planning. Well-designed databases make data entry, management and analysis easier. It maximises da…	R1-100%
39a	Is there a plan to minimise manual data entry and/or transfer? Explanation At a basic level, this involves the team doing their best to avoid duplicating work in the data collection activities of the QI initiative, where possible. More sophisticated approaches include automatic imports of data from existing systems. This will help reduce data entry errors, and avoid duplication of entries which a…	R2-78%
39b	Is there a plan for live data validation? Explanation Live data validation is where the database warns or stops the user if problematic data is entered. For instance, if a value is outside a range of likely or plausible values, list of valid diagnosis codes, post codes etc. This could also be triggered if the data is not in the correct format e.g. dates. Consistency checks can be used to verify r…	R2-81%
	Subcategory 7: Outliers and missing data
40	Is there a plan in place for both the prospective (1) identification and (2) investigation of outliers? Explanation Outliers are values of data or measures that are unusual or unlikely to be correct. Simple methods to identify outliers include specifying the minimum and maximum likely or plausible values for data items. If SPC is used, then special causes will be investigated and this can also id…	R2-84%
41	Is there a plan in place for the prospective (1) identification and (2) minimisation of missing data? Explanation Data reviews, visual cues, and reminders can be used to identify missing data. It is important to carefully distinguish between data items that are not applicable versus missing data, and branching logic is useful for this. Methods to minimise missing data include database controls; r…	R2-79%
	Category 3: Analysis
	Subcategory 8: Planning the analysis
42	Is the study design clearly stated? (If response to this question is yes, QI teams will be asked to indicate their study design.) Explanation Different evaluation designs have different strengths and weaknesses. The best choice will depend on the type of initiative and on the aims of the evaluation. It is recommended to include a time series evaluation using SPC in improvement initiatives. Types …	R1-79%
43	Have roles and responsibilities around the analyses and display of data been stated? Explanation The plan should state who will perform data analyses and presentation, when this will be done, and how the results may be accessed. Agreement from the individuals concerned and their line managers should be documented. Assigning and documenting roles and responsibilities is important for the QI team t…	R1-81%
44	Is there a plan for quantitative data analysis? Explanation The QI team can make use of measures of central tendency such as mean, median, and mode or measures of dispersion such as minimum, maximum, range and standard deviation. In addition, descriptive graphics such as pie charts, bar charts, box plots, histograms, simple line charts etc. can be used visually represent snapshots of data. Graphi…	R1-94%
44a	Is there a plan to use Statistical Process Control? (This question has an additional response of Not Applicable.) Explanation The plan QI team should state and justify the type of run or control charts they plan to use; this will depend on the type of data collected. SPC is an advantageous statistical method because it helps the team to distinguish between variation that is due to “common” and “s…	R1-83%
45	Is there a plan for qualitative data analysis? (This question has an additional response option of Not Applicable.) Explanation Qualitative data analysis usually involves designated persons in the team or skilled researchers independently coding and categorising data to identify emergent themes, generate explanations and hypotheses, then engaging in a discussion to reach a consensus. The QI team …	R1-89%
46	Is there a statement on how missing data will be accounted for in the analysis? Explanation It is best to proactively minimise missing data. However even if this is done, data may still be missed. There is no universal threshold below which missing data are acceptable. If potential for bias is low, missing data may not need to be addressed in the analyses, but simply disclosed with results. If hi…	R2-84%
47	Does the planned analysis take account of potential confounders? (This question has an additional response option of Not Applicable.) Explanation If outcomes are affected by factors not accounted for in analysis, false conclusions may result (confounding). E.g. disease severity goes down over time – it is not clear whether improvements are due to this or to the QI initiative. Confounders may be i…	R2-79%
48	Has technical expert involvement in the planning of the analysis been stated? (This question has an additional response option of Not Applicable.) Explanation Technical experts include information analysts, statisticians, qualitative researchers etc. This expertise may be available through statistical advice services, universities, QI networks and the QI host organisation. Such groups may be inte…	Consensus meeting
49	Is there explicit acknowledgement of limitations (including potential biases) of the intended analysis? Explanation Every approach to measurement and evaluation has limitations, regardless of its strengths. For example, it will not be possible or desirable to collect data on every possible factor that could influence the outcome of care for patients. So a sensible approach would be to draw on the…	Consensus meeting
50	Is the intended lag time between the data collection and data availability for feedback to the team stated? Explanation The lag time between the care being delivered and the measures of that care being analysed and available to the QI team is a crucial determinant of how useful the measurement will be in driving success of the work. The lag time should be frequent enough to capture variations in …	R2-83%
51	Is the intended frequency of feedback of the analysis to the team stated? Explanation Continuous communication of ongoing evaluation results to stakeholders is important for a capable improvement initiative. Updating and reporting the measures can be done on a daily, weekly, monthly, quarterly, or yearly basis. The frequency should be sufficient to see a pattern and for quicker action on the syst…	R1-89%
	Category 4: Action
	Subcategory 9: Planning for action
52	Is there a plan for who will receive and/or review the results from the analysis? Explanation In order for measurement to promote improvement, the QI team and other stakeholders must take appropriate action informed by the analysis. This feedback should be planned in advance. Talk to different groups about what measurement results they value, including QI team members, other healthcare staff, pat…	R1-89%
53	Has it been stated how often results will be communicated to different groups of people? Explanation Considering what measurement results stakeholders need to receive and when helps ensure that they don’t get overloaded with information, whilst remaining engaged. Think about the needs of QI team members, senior leaders, clinical leaders, health care professionals, patients and carers etc. Being c…	R2-83%
54	Have the roles and responsibilities around taking action on results been stated? Explanation While clarity around roles and responsibilities is partialy a wider organisational issue, there are steps teams may take to avoid unnecessary delay and set backs. Some of this will be covered by team and meeting structure. It is important to think through and agree where, and with whom, responsibility for…	R2-83%
55	Are there processes in place for both (1) documentation (including information that precipitated the action) and (2) follow-up of actions? Explanation It is important that agreed actions are documented, including information that precipitated the action. Actions should be followed up at a later date to ensure that they are completed, and to assess whether they have achieved the intended result. A…	R1-75%
	Category 5: Embedding
	Subcategory 10: Planning for sustainability
56	Have checkpoints for assessing the ongoing appropriateness of measures been stated? Explanation Periodic assessment of the suitability of measures for improvement can be done by asking the following questions: Does the measure accurately and reliably measure performance of the changed process? Are the benefits of the measure worth the resources required to collect and analyse the data? Can the me…	R2-84%
57	Is there a plan for monitoring the measurement process and addressing problems? Explanation Like any aspect of a QI initiative, the measurement process can be subject to barriers and delays. It is important that the team have a plan for regularly reviewing progress. Monitoring measurement progress can be done by asking the following questions: Who will be responsible for continual monitoring of t…	R1-78%
58	Is there a communications plan to ensure that relevant stakeholders are kept up to date and engaged with the initiative through the measures? Explanation To ensure an improvement is sustained in the long term, it is important to ensure that the communication plan is fit for purpose going forward. This ensures that the measurement feedback loop is closed and appropriate decisions can be made going…	R1-78%
59	Is there a plan to integrate appropriate measures into routine practice? Explanation Sustainable measurement comes from local ownership of the task. This comes when staff actually use the data themselves to help them do their work. Building data collection into routine practice decreases the data collection burden on staff, increases the likelihood of the required data being collected and inputte…	R2-89%
60	Is there a plan to assess the costs of the data collection, analysis and review cycle? Explanation Direct and indirect costs of the data collection, analysis, and review cycle can be understood through interviews, direct observation etc. to obtain data on the type of activities and the time taken. Information about the costs of collecting and reporting measure data is vital for deciding what meas…	R1-80%
61	Is there an evaluation plan for assessing sustainability of the changes made? Explanation Embedding refers to making the measures part of the normal way of running the system – so that the measures are used by people responsible for the system on a routine basis. Organisational structures in which measures for improvement can be embedded include board or directorate meetings, information displays…	R1-76%

## Sheet: Edits for Impala tool
Question Number	Design of Measurement Aims Section	Consensus to Keep	Specific Resources	Notes
1	Is the aim of the quality improvement initiative stated? Explanation The aim is what the QI team will try to accomplish. The aim needs to indicate direction. To do this, the team can use verbs such as “to improve, to reduce, to increase…” followed by a definition of what constitutes improvement, to be open to evolution over time. The aim should clarify the anticipated patient and/or public benefi…	R1 -100%		Should we change 'direction' to aspiration as per AED paper
2	Within the aim, is the benefit to patients stated? Explanation Benefits to patients and/or the public can include improved prevention of disease, safer care, better clinical outcomes, improved quality of life, more patient-centred care, better experiences of care, more timely care, more equitable services, and better value services. The Institute of Medicine’s six “Aims for Improvement” can help …	R2-79%	http://www.nationalacademies.org/hmd/~/media/Files/Report%20Files/2001/Crossing-the-Quality-Chasm/Quality%20Chasm%202001%20%20report%20brief.pdf
3	Within the aim, is the scope of the initiative defined? Explanation Scope refers to the intended reach of the initiative. It should include information about the target population (e.g. type of condition; age; severity or stage of condition; exclusions etc.), the target setting (type and number of units/sites; process to be improved etc.) and the stage of care (admission to hospital; transition f…	R1-79%
4	Within the aim, is the time frame for the initiative specified? Explanation The time by which the QI team expect to achieve the aim can be in days, months, or years. Take the environment, scope of change, and how the QI initiative fits into the overall work plan into consideration when specifying the time period. Setting a time period for a QI initiative helps in planning and makes it clear that …	R1-95%
5	Have you stated your assumptions and hypotheses about how your interventions relate your aim? Explanation Contributing factors, sometimes phrased as primary drivers or objectives, influence achievement of the aim and are logically connected to the planned intervention(s). They can be derived from Driver diagrams, Action Effect Diagrams, Logic Models etc. and may be based on existing evidence, loc…	Expert workshop	http://qualitysafety.bmj.com/content/qhc/23/12/1040.full.pdf	Replace 'your' in the question to team
6	Does the plan identify relevant contextual influences that may impact achievement of the aim? Explanation Some measures may be justified on the basis that they account for the impact of context on the intervention or its outcome. Here, context refers to factors outside the control of the initiative that have the potential to impact on its success. Process mapping of the whole patient pathway, as …	Expert workshop
7	Have numerical goals been set for the quality improvement initiative? Explanation Setting of numerical goals can be dependent on baseline performance, national standards, local targets etc. Regardless of whether numerical goals are rates, percentages, or counts, they should be stated as a desired value of measure not a relative measure. To focus the QI team in the short-term and to demonstrate ho…	R2-94%	http://www.ihi.org/resources/Pages/ImprovementStories/SetYourSightsonHalfLives.aspx
8	Have checkpoints reviewing the numerical goals been stated? Explanation Reviews of the appropriateness of numerical goals should occur at specific intervals during the QI initiative and involve stakeholders. If the numerical goal has been achieved, the QI team may want to set a higher goal. In the event that a numerical goal has not been achieved in the specified time frame, the QI team can recon…	R2-87%	http://www.ihi.org/resources/Pages/ImprovementStories/SetYourSightsonHalfLives.aspx	Should we change numerical goal percentage from 100% to something else and link it more to example in 1.6.1
9	Does the plan state who was involved in agreeing the aim? Explanation Stakeholders are people who will be affected by, or can influence the success of the QI initiative. Stakeholder analysis and mapping can be used to identify the key groups of people with different perspectives that will be needed to discuss, negotiate, and agree on an aim. This should include executive sponsors as well as patie…	R2-78%
10	Is a high level timeline for testing, scale-up and implementation proposed in the plan? Explanation Although it is not possible to plan in advance the detailed timing of Plan-Do-Study-Act cycles, the timeline should be kept high-level and refer to target dates for commencing testing of the intervention, the stages of scale up, and implementation. It is useful to show these milestones on planning …	R2-84%
Measure Set
11	Have the selected measures for improvement been identified? * Explanation Measures for improvement are a few specific measures, which demonstrate whether changes are making improvements. Action Effect Diagrams, driver diagrams, logic models etc. can be used to identify selected measures for improvement. The selected measures for improvement should be clearly named in a list. The unit of analysis …	R1-89%		Equivalent in impala is 'What measures are you reviewing as part of this review?' but no explanation or example OR 'what is the name of the measure' which does have an explanation and example - should I use it for the q3 question here Explanation Explicitly naming measures motivates those involved in ongoing improvements and is useful for operationally defining and interpreting the measure.Measur…
12	For all the selected measures, has the rationale for selection been stated? Explanation Stating the rationale involves justifying the importance and relevance of selected measures. This can be derived from evidence in existing literature, local context, and influence of internal and/or external stakeholders. In addition, reasons to support the choice of a particular type of measure (average, perc…	R1-87%		Remove 'in the secondary care qi initiative example in 2a' from the example
13	How many measures have been selected?** Explanation A measure is a way of assigning a number to an event or concept of interest, allowing comparison over time or groups. The QI team should identify a set of process, outcome and balancing measures to assess whether changes are improvements. Generally, 4-11 measures are recommended. If a measure is stratified, e.g. by age group, this counts as one …	R2-78%	file:///C:/Users/ya213/Desktop/Sampling_Considerations_for_Health_Care.5.pdf	Not included in impala at all, was meant to be automatically calculated and give feedback
14	How many outcome measures have been selected? * Explanation Outcome measures reflect the impact on the patient and show the end result of your improvement work. For example, quality of life for patients with chronic obstructive pulmonary disease after discharge from hospital. Explanation Outcome measures provide information on progress towards achieving the aim. As every QI initiative is differen…	R2-78%		Q3.2,3.3,3.4 have been revised in impala to what is the main role of this measure in the initiative, explanation in full word document not included and no example
15	How many process measures have been selected? * Explanation Process measures reflect the way your systems and processes work to deliver the outcome you want. For example, percentage of patients who had a follow up appointment booked before they left hospital. Explanation: Process measures reveal whether changes are being implemented as planned. These measures are easier to directly influence by t…	R1-83%		Q3.2,3.3,3.4 have been revised in impala to what is the main role of this measure in the initiative, explanation in full word document not included and no example
16	How many balancing measures have been selected? * Explanation: Balancing measures reflect unintended consequences of the change (positive or negative). For example, for the example project aiming at improving quality of life after discharge from hospital, the length of stay in hospital for individual patients discharged from St. Elsewhere’s hospital each week. Explanation: Balancing measures refe…	R1-83%		Q3.2,3.3,3.4 have been revised in impala to what is the main role of this measure in the initiative, explanation in full word document not included and no example
17	Does the measure set include any existing measures? Explanation Sources of existing quality measures include healthcare quality organisations, published and grey literature, and measures from other QI initiatives. Existing measures can be useful for several reasons: the necessary data and analysis may already be available (saving resources); they may have undergone a validation process; stakehold…	R1-84%		in impala this is now in the operational definition section as 'Are any of the measures already defined from an existing source? ' , although it gained consensus in R1 to be in measure set section remove 'For the secondary care QI initiative example in 2a,' from example
18	Does the plan state which stakeholders have agreed to the measure set? Explanation Different groups of people will need different types of information in order to relate to the improvement work of the QI initiative. It is crucial that the measure set includes enough measures that are useful and valued by staff and patients in the targeted part of the service. Stakeholder analysis and mapping can …	R2-88%		Remove 'For the secondary care example in 1a' from the example
	Operational Definition
19	Have operational definitions been written for all the selected measures for improvement? Explanation An operational definition is a quantifiable description of what will be measured and the specific steps to measure it consistently. It should include detailed information about the measure such as the inclusion and/or exclusion criteria, data elements, method of calculation, data source(s), method…	R1-79%		Example is very long - should we review and keep or remove
20	Q15. For all the relevant measures, have the denominators been clearly defined, including the requisite data elements? Explanation: The denominator is the lower portion of a fraction. In quality improvement, it often refers to the number of people eligible for, or at risk of, the numerator event. For percentages, the denominator is the total population or group of interest, whereas for rates, it …	R1-95%		Remove 'in example 3a' from the examples text
21	For all the relevant measures, have explicit inclusion and/or exclusion criteria been provided for the denominators? Explanation Part of clearly defining a denominator is stating any inclusion and/or exclusion criteria. The inclusion criteria describes the population of interest for the denominator, whereas, exclusion criteria describes the population not eligible for inclusion in the denominator…	R1-78%		Remove in example 3a from the example in impala
22	For all the relevant measures, have the numerators been clearly defined, including requisite data elements? Explanation The numerator is the upper portion of a fraction. In quality improvement, it often refers to the number of people who have experienced an event, such as an adverse outcome, or have received the appropriate diagnostic test or treatment. For percentages, the numerator is the numbe…	R1-100%		Remove in example 3a from the example in impala
23	For all the relevant measures, have explicit inclusion and/or exclusion criteria provided for the numerators? Explanation The inclusion criteria describes the population of interest for the numerator, whereas, exclusion criteria describes the population not eligible for inclusion in the numerator. The QI team should not simply repeat the exclusion criteria as an opposite of the inclusion criteria…	R1-78%		Remove in example 3a from the example in impala
24	For all other measures, has the measure been defined, including the requisite data elements? Explanation Data elements necessary to construct the measure should be stated, along with the calculation and aggregation method used to derive the measure. If applicable, the measurement unit and degree of precision for the data element should be stated. For instance, stating whether the length of stay i…	R1-79%		Example required in Impala
25	Has the data aggregation approach for all the measures been stated? Explanation Aggregation is the process of taking raw data and summarising it as a number, and can include counting, averaging (using the mean, median, or mode), summing, and expressing as a proportion. Unless a measure pertains to individuals (e.g. measuring length of stay of consecutive patients as a time series), it is likely t…	R1-84%		Remove in example 3a from the example in impala
26	Have the source(s) of data collection been clearly stated for all the measures? Explanation Different types of data can be collected from multiple sources for differing purposes. These include routinely collected data in existing administrative databases, existing medical records, prospectively collected clinical data, and prospectively collected survey data from questionnaires and interviews. Th…	R1-95%	https://qiready.rcgp.org.uk/wp/wp-content/uploads/Data-sources-useful-for-QI_Dec2016.pdf https://books.google.co.uk/books?id=MtBlevPHBCgC&pg=PA95&lpg=PA95&dq=routinely+collected+data+quality+improvement&source=bl&ots=MNnP_M2YQP&sig=7vyEMNcsgXPRSBRsCZqTfQpMres&hl=en&sa=X&ved=0ahUKEwjh1rCwrKPJAhUFOhQKHQu_Di4Q6AEIQjAD#v=onepage&q=routinely%20colle&f=false	Remove in example 3a from the example in impala
27	Is there a statement on the feasibility of using routinely collected data for the measures? Explanation Using existing medical records or mandatory reporting databases, the QI team can access a vast amount of routinely collected data on patient demographics, clinical condition, care received, and outcomes. To establish what data exists, teams can communicate with information technology and inform…	R2-79%		Remove in example 3a from the example in impala
28	Has access been granted to all the required data? Explanation Knowing the data exists is not the same as being able to use it. Communicate early with the information manager for the database of interest for access to be granted to the routinely collected data. Depending on the data source, there may be public access to the data, access may require an email address and/or password, it may have to …	R1-83%
29	Have methods of data collection been stated for all the measures? Explanation Methods of data collection refer to the procedures and processes that will be used to gather the data from its source. For instance, if using equipment, specify the name of the device, how it will be used, and the degree of precision needed, that is, whole numbers or decimal places. It is most desirable for the method o…	R1-100%		Remove in example 3a from the example in impala
30	Has the frequency of data collection been stated for all the measures? Explanation Measures should be collected at intervals frequent enough to assess and act on project progress. This could mean continuously, hourly, daily, weekly, bi-weekly, monthly, or quarterly. The QI team should also take the duration of the data collection into account when deciding how often they will collect data, as thi…	R1-95%		Remove in example 3a from the example in impala
31	Does the plan make clear whether and why measures have or have not been stratified? Explanation Stratification is when a measure is considered separately for data from different subgroups. Knowledge of differences in processes of care can be used to decide on stratification. Examples include different time periods (e.g. weekend versus weekday); demographics such as age; organisation/unit; treatme…	R1-82%
32	Is it clear, for each measure, whether census or sampling will be used?* Explanation: Census refers to all the available data from the population of interest, whereas for sampling only a subset i.e. sample of the data from the population will be collected. If population of interest is small or data for all patients or service users is already available, there is no need to sample and all availabl…	R1-82%	https://www.ncbi.nlm.nih.gov/pubmed/25260103 Judgment Sampling: A Health Care Improvement Perspective http://ovidsp.tx.ovid.com/sp-3.30.0b/ovidweb.cgi?WebLinkFrameset=1&S=GDECFPGLPFDDNNGJNCEKBFOBDCHAAA00&returnUrl=ovidweb.cgi%3f%26Full%2bText%3dL%257cS.sh.22.23%257c0%257c00019514-201207000-00006%26S%3dGDECFPGLPFDDNNGJNCEKBFOBDCHAAA00&directlink=http%3a%2f%2fovidsp.tx.ovid.com%2fovftpdfs%2fFPDDNCO…	has been taken to different location on impala tool 'Does this measure use sampling?' and has no explanation or example in impala
33	For all the relevant measures, have the sampling strategies been described? Explanation For each relevant measure, give a precise operational statement on how, when, and by whom samples will be chosen, along with any sample size constraints. For statistical process control (SPC), there are resources available providing guidance, and experts can be consulted. For statistics for inference, e.g. con…	R1-89%	http://qualitysafety.bmj.com/content/early/2017/11/02/bmjqs-2017-006963 https://www.ncbi.nlm.nih.gov/pubmed/25260103 Judgment Sampling: A Health Care Improvement Perspective http://ovidsp.tx.ovid.com/sp-3.30.0b/ovidweb.cgi?WebLinkFrameset=1&S=GDECFPGLPFDDNNGJNCEKBFOBDCHAAA00&returnUrl=ovidweb.cgi%3f%26Full%2bText%3dL%257cS.sh.22.23%257c0%257c00019514-201207000-00006%26S%3dGDECFPGLPFDDNNGJNCEKBFOB…	Example required for impala
34	Has the process for establishing baseline performance been stated for all the measures? Explanation The QI team should make use of run or control charts to establish a robust baseline. 20 to 25 data points is usually enough to establish representative baseline data using a control chart, or 12 points when using a run chart. So for a weekly control chart, 20-25 weeks is ideal. Exceptions include w…	R2-95%
35	Has a baseline data collection time frame been specified for all the selected measures? Explanation Baseline data indicates current performance of the system with respect to each measure before implementation of any interventions. Without knowing the current performance, the team will be unable to know or demonstrate whether the change was indeed an improvement. For some measures, notably measure…	R1-83%
36	Is it clear that baseline data will use the same operational definitions as developed for the measures? Explanation If the operational definitions used for baseline data differ from the operational definitions used for measure data collected after implementing changes, an accurate comparison cannot be made as slightly different phenomena may have been measured. This is most often a problem when e…	R1-78%
37	Have you documented that the relevant stakeholders have been consulted about the operational definitions? Explanation It is important that relevant stakeholders have reviewed and agreed to the operational definitions. This is not limited to information analysts and statisticians; this can also include clinicians, patients and managers. Before sign off, the definitions should have been tested in p…	Expert workshop		Example required for impala
Data Collection and Management
Data Collection Process
38	Have resources required for data collection been specified? Explanation Resources for data collection and management can include funding for training staff, payment for overtime or bank staff during the project phase, payment for backfill, time for staff involved, and type of equipment required. The QI team should seek a balance between the resources required to collect and manage data to constru…	R1-84%
39	Have roles and responsibilities around data collection, storage and management been stated? Explanation Roles and responsibilities for data collection and management should be discussed and agreed by the QI team. As measurement becomes part of routine, responsibility for this should shift from the QI team to the organisation. Assigning roles and responsibilities for data collection is vital for e…	R1-89%
40	Has the protocol for data management been described? Explanation The plan should include a short but comprehensive statement of how the data will be processed and managed from collection to safe storage. It should include responsibilities for data flow, checks and feedback on completeness of data, safeguards against accidental corruption or loss of data, and how the security of the data will be m…	R1-89%		Example required for impala
41	Is there a plan in the data management protocol to prevent data corruption or loss? Explanation Ways to prevent corruption and loss of data can include ensuring anti-virus software is updated, having an adequate and tested back-up routine for any databases, including how often back-ups will occur. Having steps in place to prevent data corruption or loss is important because of the risk of any sen…	R1-89%
42	Is there a plan in the data management protocol to ensure that data are secure? Explanation Data security refers to the necessary procedures and technical measures put in place to ensure the privacy and confidentiality of collected data. Strategies to keep data secure include deciding who is authorised to access, edit and delete the collected data, and ensuring that this is reflected in the relev…	R1-83%		Example required for impala
43	Does the plan state how the data should be collected? (e.g. paper form, electronic form, wearable device, etc.) Explanation Collected data can be recorded into existing information systems or the QI team can prepare a paper form to capture the data. Knowledge of the data collection tool and where it is stored ensures that when there is turnover of data collection staff, the files can be easily lo…	Expert workshop
44	Is there a plan for pilot-testing new or adapted data collection tools? Explanation Pilot testing of the data collection tool should be done on a small sample. Even for routinely collected data, it is important to check that the desired extracts can be obtained. Pilot testing the data collection tool helps to ensure that collected data is accurate and recorded consistently. It is useful for ident…	R1-83%
45	Have negative impacts of data collection on patients or staff involved in the initiative been considered? Explanation Negative impacts can be identified when data collection tools are pilot tested. Examples include data collection competing for time with care provision. Whilst such issues may be captured through balancing measures, these measures are often not explicitly constructed to pick up ne…	R1-89%		Example in impala not complete
46	Is there a plan to seek and obtain ethical approval? Explanation The QI team can consult local (i.e. institutional), regional or national policies to find out if ethical approval is required. If an initiative is deemed exempt from an ethics review, the reason for exemption should be clearly stated. For instance, if the policy used specifies that the QI team should make the decision as to whether …	R1-89%	http://qualitysafety.bmj.com/pages/wp-content/uploads/sites/44/2017/02/PolicyonEthicReviews.pdf	Not applicable is required in Impala
	Training in and Embedding of Consistent Data Collection
47	Is there a plan for a training programme for data collection staff? Explanation Training programmes should be appropriate to the context within which data is being collected, for instance, face-to-face communication, telephone etc. To sustain data collection efforts, the team should consider training of additional persons in the event that some staff members involved in data collection become una…	R1-88%		Not applicable is required in Impala
48	Is there a plan to assess the quality of data collection throughout the initiative? Explanation Data quality assurance reviews are retrospective and involve checking the accuracy and completeness of a sample of collected data. This can be done at random or pre-set times throughout the life span of the QI initiative. This quality assurance can draw on other databases or on manual review. Depending…	R1-94%
	Database Design
49	Is there a plan to create or modify a database for the project data? Explanation Existing databases can be modified, or if not, a new database can be created. Information analysts and IT teams can often advise on the best approach for the organisation. Development of a database requires resource and planning. Well-designed databases make data entry, management and analysis easier. It maximises da…	R1-100%		Not applicable is required in Impala
50	Is there a plan to minimise manual data entry and/or transfer? Explanation At a basic level, this involves the team doing their best to avoid duplicating work in the data collection activities of the QI initiative, where possible. More sophisticated approaches include automatic imports of data from existing systems. This will help reduce data entry errors, and avoid duplication of entries which a…	R2-78%
51	Is there a plan for live data validation? Explanation Live data validation is where the database warns or stops the user if problematic data is entered. For instance, if a value is outside a range of likely or plausible values, list of valid diagnosis codes, post codes etc. This could also be triggered if the data is not in the correct format e.g. dates. Consistency checks can be used to verify r…	R2-81%
	Outliers and Missing Data
52	Is there a plan in place for both the prospective (1) identification and (2) investigation of outliers? Explanation Outliers are values of data or measures that are unusual or unlikely to be correct. Simple methods to identify outliers include specifying the minimum and maximum likely or plausible values for data items. If SPC is used, then special causes will be investigated and this can also id…	R2-84%
53	Is there a plan in place for the prospective identification and minimisation of missing data? Explanation Data reviews, visual cues, and reminders can be used to identify missing data. It is important to carefully distinguish between data items that are not applicable versus missing data and branching logic is useful for this. Methods to minimise missing data include database controls; data colle…	R2-79%
Analysis
Planning the Analysis
54	Is the study design clearly stated? Explanation Different evaluation designs have different strengths and weaknesses. The best choice will depend on the type of initiative and on the aims of the evaluation. It is recommended to include a time series evaluation using SPC in improvement initiatives. Types of evaluation designs are listed below: a. Before-after study (no controls) b. Before-after st…	R1-79%		No Example in impala
55	Have roles and responsibilities around the analyses and display of data been stated? Explanation The plan should state who will perform data analyses and presentation, when this will be done, and how the results may be accessed. Agreement from the individuals concerned and their line managers should be documented. Assigning and documenting roles and responsibilities is important for the QI team t…	R1-81%
56	Is there a plan for quantitative data analysis? Explanation The QI team can make use of measures of central tendency such as mean, median, and mode or measures of dispersion such as minimum, maximum, range and standard deviation. In addition, descriptive graphics such as pie charts, bar charts, box plots, histograms, simple line charts etc. can be used visually represent snapshots of data. Graphi…	R1-94%	http://www.wales.nhs.uk/sites3/Documents/841/Run%20charts%20%28August%202011%29.pdf http://qualitysafety.bmj.com/content/qhc/20/Suppl_1/i92.full.pdf
57	Is there a plan to use Statistical Process Control? Explanation The plan QI team should state and justify the type of run or control charts they plan to use; this will depend on the type of data collected. SPC is an advantageous statistical method because it helps the team to distinguish between variation that is due to “common” and “special” causes, and to act accordingly. It provides continuous…	R1-83%	http://qualitysafety.bmj.com/content/qhc/13/4/243.full.pdf Wheeler D. Advanced Topics in Statistical Process Control: The Power of Shewhart‟s Wheeler D. Making Sense of Data: SPC for the Service Sector,. SPC Press; Health care data guide	Not applicable required in Impala
58	Is there a plan for qualitative data analysis? Explanation Qualitative data analysis usually involves designated persons in the team or skilled researchers independently coding and categorising data to identify emergent themes, generate explanations and hypotheses, then engaging in a discussion to reach a consensus. The QI team should seek advice from experienced qualitative researchers to assist…	R1-89%	https://www.ncbi.nlm.nih.gov/pmc/articles/PMC1117368/pdf/114.pdf https://www.cdc.gov/dhdsp/pubs/docs/CB_November_8_2011.pdf http://qualitysafety.bmj.com/content/qhc/11/2/148.full.pdf	Not applicable required in Impala
59	Is there a statement on how missing data will be accounted for in the analysis? Explanation It is best to proactively minimise missing data. However even if this is done, data may still be missed. There is no universal threshold below which missing data are acceptable. If potential for bias is low, missing data may not need to be addressed in the analyses, but simply disclosed with results. If hi…	R2-84%		Example missing in Impala
60	Does the planned analysis take account of potential confounders? Explanation If outcomes are affected by factors not accounted for in analysis, false conclusions may result (confounding). E.g. disease severity goes down over time – it is not clear whether improvements are due to this or to the QI initiative. Confounders may be included in the dataset, including data on contextual factors. Action …	R2-79%		Not applicable required in Impala
61	Has technical expert involvement in the planning of the analysis been stated? Explanation Technical experts include information analysts, statisticians, qualitative researchers etc. This expertise may be available through statistical advice services, universities, QI networks and the QI host organisation. Such groups may be interested in collaboration as research partners: providing help, advice,…	Expert workshop		Expert workshop wanted us to say specialist advise rather than technical expert on data analysis , not applicable option is also required in Impala
62	Is there explicit acknowledgement of limitations (including potential biases) of the intended analysis? Explanation Every approach to measurement and evaluation has limitations, regardless of its strengths. For example, it will not be possible or desirable to collect data on every possible factor that could influence the outcome of care for patients. So a sensible approach would be to draw on the…	Expert workshop		Example missing in Impala
63	Is the intended lag time between the data collection and data availability for feedback to the team stated? Explanation The lag time between the care being delivered and the measures of that care being analysed and available to the QI team is a crucial determinant of how useful the measurement will be in driving success of the work. The lag time should be frequent enough to capture variations in …	R2-83%
64	Is the intended frequency of feedback of the analysis to the team stated? Explanation Continuous communication of ongoing evaluation results to stakeholders is important for a capable improvement initiative. Updating and reporting the measures can be done on a daily, weekly, monthly, quarterly, or yearly basis. The frequency should be sufficient enough to see a pattern and for quicker action on t…	R1-89%
	Action
	Planning for Action
65	Is there a plan for who will receive and/or review the results from the analysis? Explanation In order for measurement to promote improvement, the QI team and other stakeholders must take appropriate action informed by the analysis. This feedback should be planned in advance. Talk to different groups about what measurement results they value, including QI team members, other healthcare staff, pat…	R1-89%
66	Has it been stated how often results will be communicated to different groups of people? Explanation Considering what measurement results stakeholders need to receive and when helps ensure that they don’t get overloaded with information, whilst remaining engaged. Think about the needs of QI team members, senior leaders, clinical leaders, health care professionals, patients and carers etc. Being c…	R2-83%		No example in impala
67	Have the roles and responsibilities around taking action on results been stated? Explanation While clarity around roles and responsibilities is partialy a wider organisational issue, there are steps teams may take to avoid unnecessary delay and set backs. Some of this will be covered by team and meeting structure. It is important to think through and agree where, and with whom, responsibility for…	R2-83%		No example in impala
68	Are there processes in place for both (1) documentation (including information that precipitated the action) and (2) follow-up of actions? Explanation It is important that agreed actions are documented, including information that precipitated the action. Actions should be followed up at a later date to ensure that they are completed, and to assess whether they have achieved the intended result. A…	R1-75%
	Embedding
	Planning for Sustainability
69	Have checkpoints for assessing the ongoing appropriateness of measures been stated? Explanation Periodic assessment of the suitability of measures for improvement can be done by asking the following questions: Does the measure accurately and reliably measure performance of the changed process? Are the benefits of the measure worth the resources required to collect and analyse the data? Can the me…	R2-84%	http://qualitysafety.bmj.com/content/qhc/17/3/182.full.pdf
70	Is there a plan for monitoring the measurement process and addressing problems? Explanation Like any aspect of a QI initiative, the measurement process can be subject to barriers and delays. It is important that the team have a plan for regularly reviewing progress. Monitoring measurement progress can be done by asking the following questions: Who will be responsible for continual monitoring of t…	R1-78%	http://bmjopen.bmj.com/content/bmjopen/7/9/e014417.full.pdf http://www.hqontario.ca/Portals/0/Documents/qi/qi-sustainability-planner-instruction-sheet-and-tool-en.pdf
71	Is there a communications plan to ensure that relevant stakeholders are kept up to date and engaged with the initiative through the measures? Explanation To ensure an improvement is sustained in the long term, it is important to ensure that the communication plan is fit for purpose going forward. This ensures that the measurement feedback loop is closed and appropriate decisions can be made going…	R1-78%
72	Is there a plan to integrate appropriate measures into routine practice? Explanation Sustainable measurement comes from local ownership of the task. This comes when staff actually use the data themselves to help them do their work. Building data collection into routine practice decreases the data collection burden on staff, increases the likelihood of the required data being collected and inputte…	R2-89%
73	Is there a plan to assess the costs of the data collection, analysis and review cycle? Explanation Direct and indirect costs of the data collection, analysis, and review cycle can be understood through interviews, direct observation etc. to obtain data on the type of activities and the time taken. Information about the costs of collecting and reporting measure data is vital for deciding what meas…	R1-80%		Example in Impala is not complete
74	Is there an evaluation plan for assessing sustainability of the changes made? Explanation Embedding refers to making the measures part of the normal way of running the system – so that the measures are used by people responsible for the system on a routine basis. Organisational structures in which measures for improvement can be embedded include board or directorate meetings, information displays…	R1-76%
